# Supplementary material for: Impulsivity in Bipolar Disorder: State or Trait?
Source: MDPI journal article supplement (doi:10.3390/brainsci12101351), 2022-10-05
Supplement: s1 [file s1]

Table S1. Quality assessment of included studies.

| Study                      | Quality assessment item |   |   |   |   |   |   |   |   |    |    | Overall summary score |
|----------------------------|-------------------------|---|---|---|---|---|---|---|---|----|----|-----------------------|
|                            | 1                       | 2 | 3 | 4 | 5 | 6 | 7 | 8 | 9 | 10 | 11 |                       |
| Akbari et al. [56]         | 1                       | 1 | 1 | 2 | 1 | 0 | 2 | 1 | 1 | 1  | 1  | 0.55                  |
| Baldaçara et al. [2]       | 2                       | 2 | 1 | 2 | 2 | 0 | 2 | 2 | 1 | 2  | 2  | 0.82                  |
| Bersani et al. [57]        | 2                       | 1 | 1 | 2 | 2 | 0 | 2 | 2 | 1 | 2  | 2  | 0.77                  |
| Carrus et al. [17]         | 2                       | 2 | 1 | 2 | 2 | 1 | 2 | 2 | 1 | 2  | 1  | 0.82                  |
| Cheema et al. [37]         | 2                       | 2 | 2 | 2 | 2 | 1 | 2 | 2 | 2 | 2  | 2  | 0.95                  |
| Choi et al. [38]           | 1                       | 1 | 1 | 2 | 2 | 1 | 2 | 2 | 1 | 2  | 2  | 0.77                  |
| Çörekçioğlu et al. [39]    | 1                       | 1 | 1 | 2 | 2 | 1 | 2 | 2 | 1 | 2  | 2  | 0.77                  |
| Das et al. [32]            | 2                       | 2 | 1 | 2 | 1 | 0 | 2 | 2 | 1 | 2  | 1  | 0.73                  |
| de Almeida et al. [9]      | 2                       | 2 | 1 | 1 | 1 | 1 | 2 | 2 | 1 | 2  | 2  | 0.77                  |
| Dev et al. [58]            | 2                       | 2 | 1 | 2 | 1 | 1 | 2 | 2 | 2 | 2  | 2  | 0.86                  |
| Duek et al. [21]           | 2                       | 2 | 1 | 2 | 1 | 1 | 2 | 2 | 1 | 2  | 1  | 0.77                  |
| Ekinçi et al. [40]         | 1                       | 2 | 2 | 2 | 2 | 1 | 2 | 1 | 2 | 2  | 2  | 0.86                  |
| Eroglu & Lus [33]          | 2                       | 2 | 1 | 2 | 1 | 1 | 1 | 2 | 1 | 2  | 1  | 0.73                  |
| Farahmand et al. [59]      | 2                       | 2 | 1 | 2 | 2 | 1 | 2 | 2 | 1 | 2  | 2  | 0.86                  |
| Feliu-Soler et al. [60]    | 1                       | 2 | 1 | 1 | 2 | 1 | 2 | 2 | 1 | 2  | 2  | 0.77                  |
| Frangou et al. [13]        | 2                       | 2 | 1 | 2 | 2 | 0 | 1 | 2 | 1 | 2  | 1  | 0.73                  |
| Henna et al. [41]          | 2                       | 2 | 1 | 2 | 2 | 1 | 2 | 2 | 0 | 2  | 2  | 0.82                  |
| Hidiroğlu et al. [42]      | 2                       | 2 | 1 | 2 | 2 | 1 | 2 | 2 | 1 | 2  | 2  | 0.86                  |
| Hidiroğlu et al. [61]      | 2                       | 2 | 1 | 2 | 2 | 1 | 2 | 2 | 1 | 2  | 2  | 0.86                  |
| Ibanez et al. [14]         | 2                       | 2 | 1 | 2 | 1 | 0 | 2 | 2 | 1 | 2  | 1  | 0.73                  |
| Izci et al. [43]           | 1                       | 2 | 1 | 2 | 2 | 1 | 1 | 2 | 1 | 2  | 2  | 0.77                  |
| Izci et al. [44]           | 1                       | 2 | 1 | 2 | 2 | 1 | 2 | 2 | 1 | 2  | 1  | 0.77                  |
| Kaladjian et al. [7]       | 2                       | 2 | 1 | 2 | 2 | 0 | 1 | 2 | 1 | 2  | 1  | 0.73                  |
| Kaladjian et al. [62]      | 2                       | 2 | 1 | 2 | 2 | 1 | 2 | 2 | 1 | 2  | 2  | 0.86                  |
| Kollmann et al. [22]       | 2                       | 2 | 1 | 2 | 2 | 0 | 2 | 2 | 1 | 2  | 2  | 0.82                  |
| Kolur et al. [19]          | 1                       | 2 | 2 | 2 | 1 | 1 | 2 | 2 | 2 | 2  | 2  | 0.86                  |
| Lewis et al. [36]          | 2                       | 2 | 1 | 1 | 1 | 1 | 1 | 2 | 2 | 2  | 2  | 0.77                  |
| Lois et al. [45]           | 2                       | 2 | 1 | 2 | 1 | 1 | 2 | 2 | 2 | 2  | 2  | 0.86                  |
| Lombardo et al. [8]        | 2                       | 2 | 2 | 2 | 1 | 1 | 2 | 2 | 1 | 2  | 2  | 0.86                  |
| Malloy-Diniz et al. [63]   | 1                       | 2 | 2 | 2 | 2 | 1 | 2 | 2 | 2 | 2  | 2  | 0.91                  |
| Mazer et al. [35]          | 1                       | 2 | 1 | 2 | 1 | 1 | 2 | 2 | 1 | 2  | 2  | 0.77                  |
| Morsel et al. [64]         | 2                       | 2 | 1 | 2 | 2 | 1 | 2 | 2 | 1 | 2  | 1  | 0.82                  |
| Nery-Fernandes et al. [46] | 1                       | 1 | 1 | 2 | 1 | 1 | 2 | 1 | 1 | 2  | 2  | 0.68                  |
| Okasha et al. [4]          | 1                       | 2 | 1 | 2 | 1 | 1 | 1 | 2 | 1 | 2  | 2  | 0.73                  |
| Ozten & Erol [48]          | 1                       | 2 | 1 | 2 | 2 | 1 | 1 | 2 | 0 | 1  | 2  | 0.68                  |
| Peluso et al. [49]         | 1                       | 2 | 1 | 2 | 1 | 0 | 2 | 2 | 1 | 2  | 2  | 0.73                  |
| Robinson et al. [65]       | 2                       | 2 | 2 | 2 | 2 | 1 | 2 | 2 | 2 | 2  | 1  | 0.91                  |
| Rocha et al. [47]          | 1                       | 2 | 1 | 2 | 2 | 1 | 2 | 2 | 1 | 2  | 2  | 0.82                  |
| Rote et al. [3]            | 2                       | 2 | 2 | 2 | 2 | 1 | 2 | 2 | 2 | 2  | 2  | 0.95                  |
| Sarnicola et al. [66]      | 2                       | 0 | 1 | 2 | 2 | 1 | 2 | 2 | 1 | 2  | 2  | 0.77                  |

|                      |   |   |   |   |   |   |   |   |   |   |   |      |
|----------------------|---|---|---|---|---|---|---|---|---|---|---|------|
| Saunders et al. [34] | 2 | 2 | 1 | 1 | 2 | 1 | 2 | 2 | 1 | 2 | 2 | 0.82 |
| Scholz et al. [50]   | 1 | 1 | 2 | 2 | 2 | 1 | 2 | 2 | 2 | 2 | 2 | 0.86 |
| Strasser et al. [51] | 2 | 2 | 1 | 2 | 2 | 1 | 2 | 2 | 2 | 2 | 2 | 0.91 |
| Swann et al. [52]    | 1 | 2 | 1 | 1 | 2 | 1 | 0 | 1 | 0 | 2 | 1 | 0.55 |
| Swann et al. [67]    | 2 | 1 | 1 | 1 | 2 | 1 | 1 | 2 | 2 | 2 | 2 | 0.77 |
| Swann et al. [53]    | 1 | 1 | 1 | 2 | 2 | 0 | 2 | 2 | 1 | 2 | 2 | 0.73 |
| Tu et al. [54]       | 2 | 1 | 1 | 2 | 2 | 1 | 2 | 2 | 2 | 2 | 2 | 0.86 |
| Tunc & Kose [55]     | 1 | 2 | 1 | 1 | 2 | 1 | 2 | 2 | 0 | 1 | 1 | 0.64 |

Item numbers correspond to the domains delineated below. Items are rated as 2 = ‘yes’; 1 = ‘partial’ or 0 = “no”. Summary scores are calculated as the sum of all ratings divided by the total possible score. Summary scores closer to 1 indicate higher quality.

**Quality assessment items:** **1.** Question/objective sufficiently described; **2.** Study design evident and appropriate; **3.** Method of subject/comparison group selection or source information/input variables described and appropriate; **4.** Subject and comparison group characteristics sufficiently described; **5.** Outcome measure(s) well defined and robust to measurement/misclassification bias; means of assessment reported; **6.** Sample size appropriate; **7.** Analytic methods described/justified and appropriate; **8.** Some estimate of variance is reported for the main results; **9.** Controlled for confounding; **10.** Results reported in sufficient detail; **11.** Conclusions supported by the results.
